# Supplementary material for: Ultraconserved region-containing Transformer 2β4 controls senescence of colon cancer cells
Source: PubMed Central journal article supplement (PMC4848834; doi:10.1038/oncsis.2016.18), 2016-04-04
Supplement: oncsis201618x1.pdf [file oncsis201618x1.pdf]

```

Mm  TGCATAT-CTAGTATTTTTTT-----AATCCAAAACACGAAAAGGGATTTTTTT
Rn  TGCATAT-CTAGTTTTTTTTTTTTTTTTTAAATCCAAAACACAAAAGGGATTTTTTT
Hs  TGCATATCTAGTTTCTTTTTTTTTTTTTTAAATCCAAATCAAC--AAAGGGATTTTTTT
      *****  ***** * *****                ***** * ** *****

Mm  TT-CTAGTTTCAGTTTGGCACTGGATTTTATCCTGGAGTTTAAAAATATCTTCATCCT
Rn  T-CTAGTTTCAGTTTGGCACTGGATTTTATCCTGGAGTTTAAAAATATCTTCATCCT
Hs  TTTCTAGTTTCAGTTTGGCACTGGATTTTATCCTGGAGTTTAAAAATATCTTCATCCT
      * *****

Mm  GTTCTTTTCTATTAAGGTTAATGTTGAAGAAGGAAAAATGCGGAAGTCGTCATTTGACAA
Rn  GTTCTTTTCTATTAAGGTTAATGTTGAAGAAGGAAAAATGCGGAAGTCGTCATTTGACAA
Hs  GTTCTTTTCTATTAAGGTTAATGTTGAAGAAGGAAAAATGCGGAAGTCGTCATTTGACAA
      *****

Mm  GTTTTATAAATGAGTATTTGAAGCTCAGGAATAAGTGAAGCTGAAATTTGAAAAATAAA
Rn  GTTTTATAAATGAGTATTTGAAGCTCAGGAATAAGTGAAGCTGAAATTTGAAAAATAAA
Hs  GTTTTATAAATGAGTATTTGAAGCTCAGGAATAAGTGAAGCTGAAATTTGAAAAATAAA
      *****

Mm  AGAAAGAATGCATGCTAATTATCAGACCAGAAGTCCCCTTGTAGAATATTGAGCAATTT
Rn  AGAAAGAATGCATGCTAATTATCAGACCAGAAGTCCCCTTGTAGAATATTGAGCAATTT
Hs  AGAAAGAATGCATGCTAATTATCAGACCAGAAGTCCCCTTGTAGAATATTGAGCAATTT
      *****

Mm  GTGTGAAGTGGGGAAGATGAAAGAAGTCAGAATTTGAAACGGAAGAATGAAGAAAAGAAA
Rn  GTGTGAAGTGGGGAAGATGAAAGAAGTCAGAATTTGAAACGGAAGAATGAAGAAAAGAAA
Hs  GTGTGAAGTGGGGAAGATGAAAGAAGTCAGAATTTGAAACGGAAGAATGAAGAAAAGAAA
      *****

Mm  TAAAAATGAAGTTAAGATAAGAAGTAATCTGGAATCAGAAAGCACACGCTAAGTAATTA
Rn  TAAAAATGAAGTTAAGATAAGAAGTAATCTGGAATCAGAAAGCACACGCTAAGTAATTA
Hs  TAAAAATGAAGTTAAGATAAGAAGTAATCTGGAATCAGAAAGCACACGCTAAGTAATTA
      *****

Mm  CTAGTCTGTTTATGTGTCCCTGTATATTTTGCTAAACATGCATGCATTATTTGTTTAATA
Rn  CTAGTCTGTTTATGTGTCCCTGTATATTTTGCTAAACATGCATGCATTATTTGTTTAATA
Hs  CTAGTCTGTTTATGTGTCCCTGTATATTTTGCTAAACATGCATGCATTATTTGTTTAATA
      *****

Mm  GAAAGAA-GTATATACAGGGTAAAGAAGTGACTTCCAAGGGAATCGTTTAAA
Rn  GAAAGAAAGTATATACAGGGTAAAGAAGTGACTTCCAAGGGAATCGTTTAAA
Hs  GAAAGAAATATATACAGGGTAAAGAAGTGACTTCCAAGGGAACGTTTAAA
      ** * * * * *

```

Fig. S1 Alignment of ultraconserved sequences (uc.138) in *TRA2B* genes.

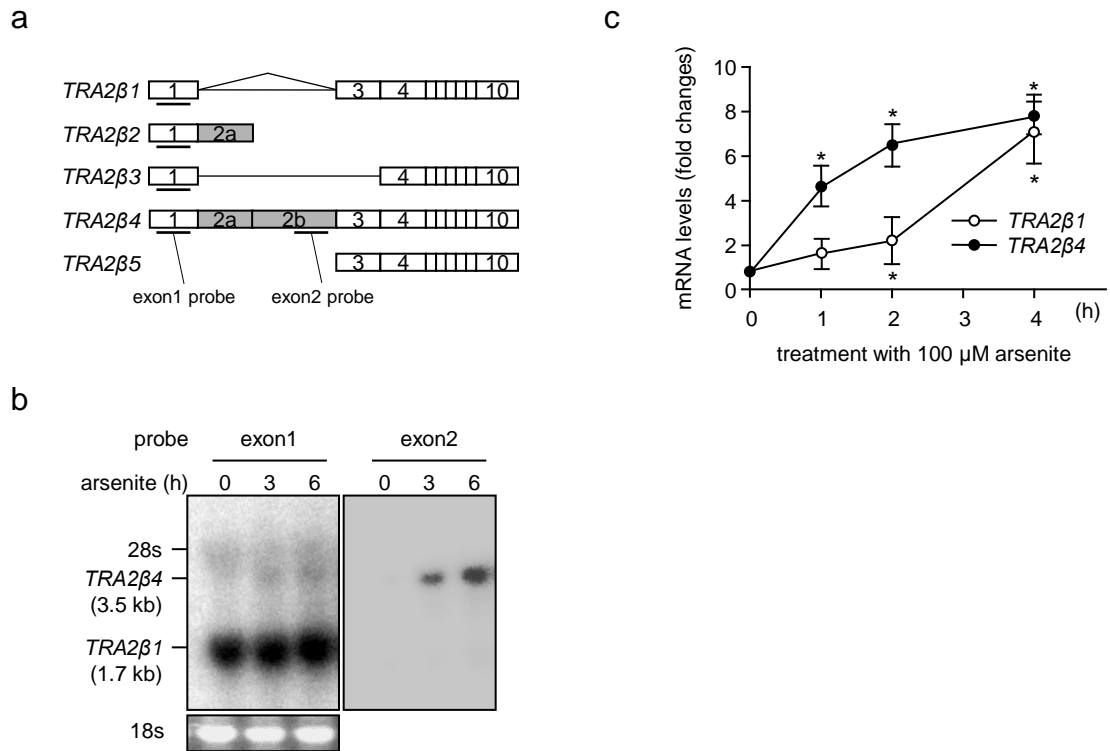

Fig. S2 Arsenite-stimulated expression of *TRA2β4* in HCT116 cells.

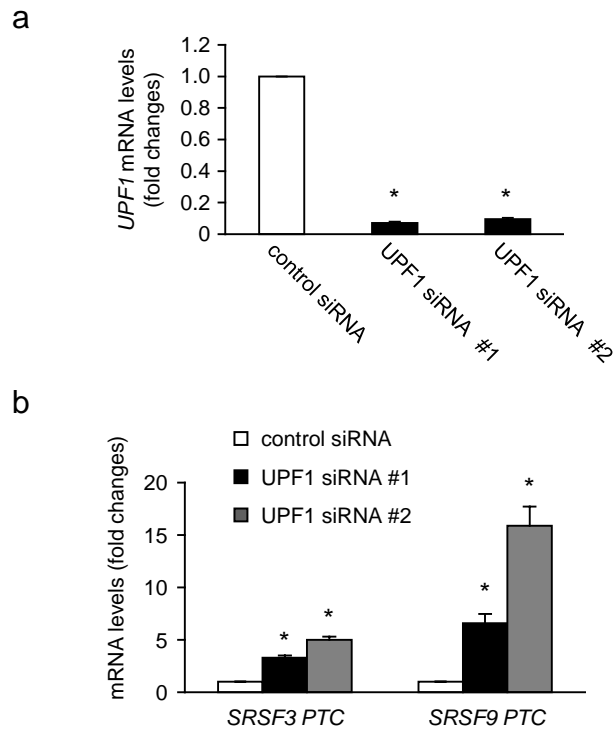

Fig. S3 UPF1 knockdown increases PTC variants of *SRSF3* and *SRSF9*.

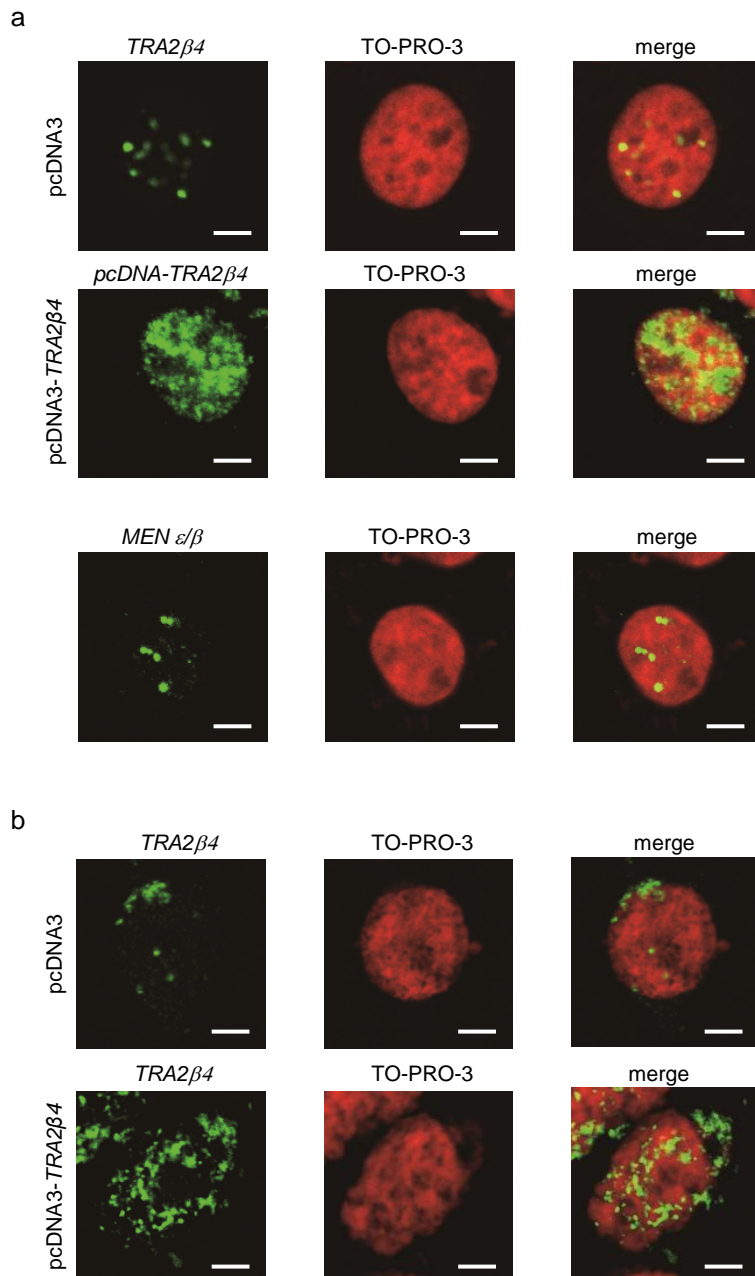

Fig. S4 Nuclear localization of *TRA2 $\beta$ 4*.

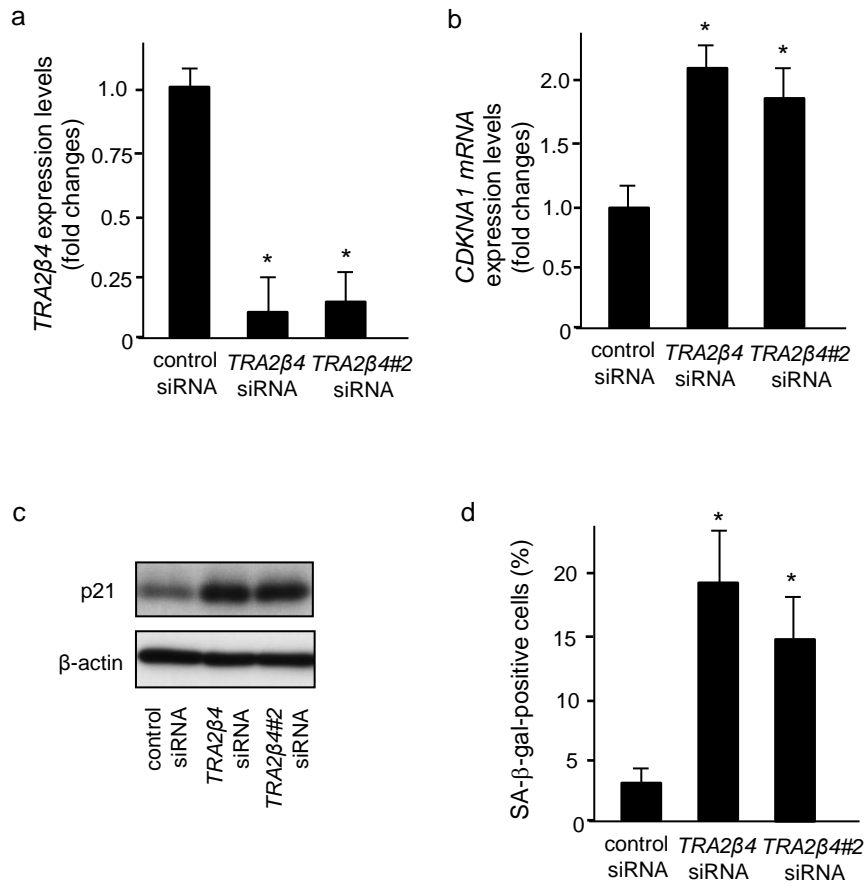

Fig. S5 *TRA2β4* knockdown increased expression of *CDKNA1* mRNA and p21 protein, and induced cellular senescence.

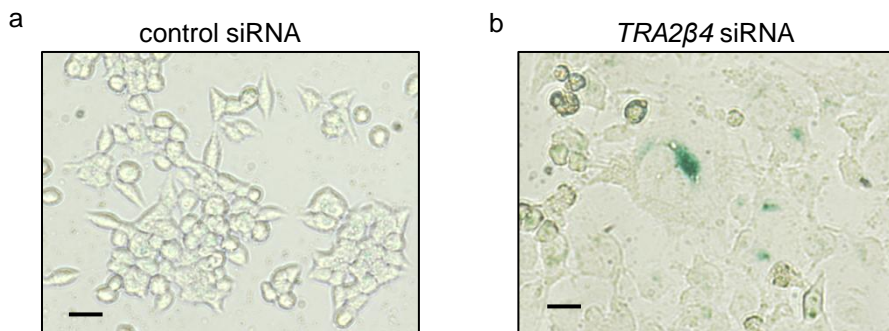

Fig. S6 *TRA2 $\beta$ 4* knockdown facilitates cellular senescence in p53<sup>-/-</sup> HCT116 cells.

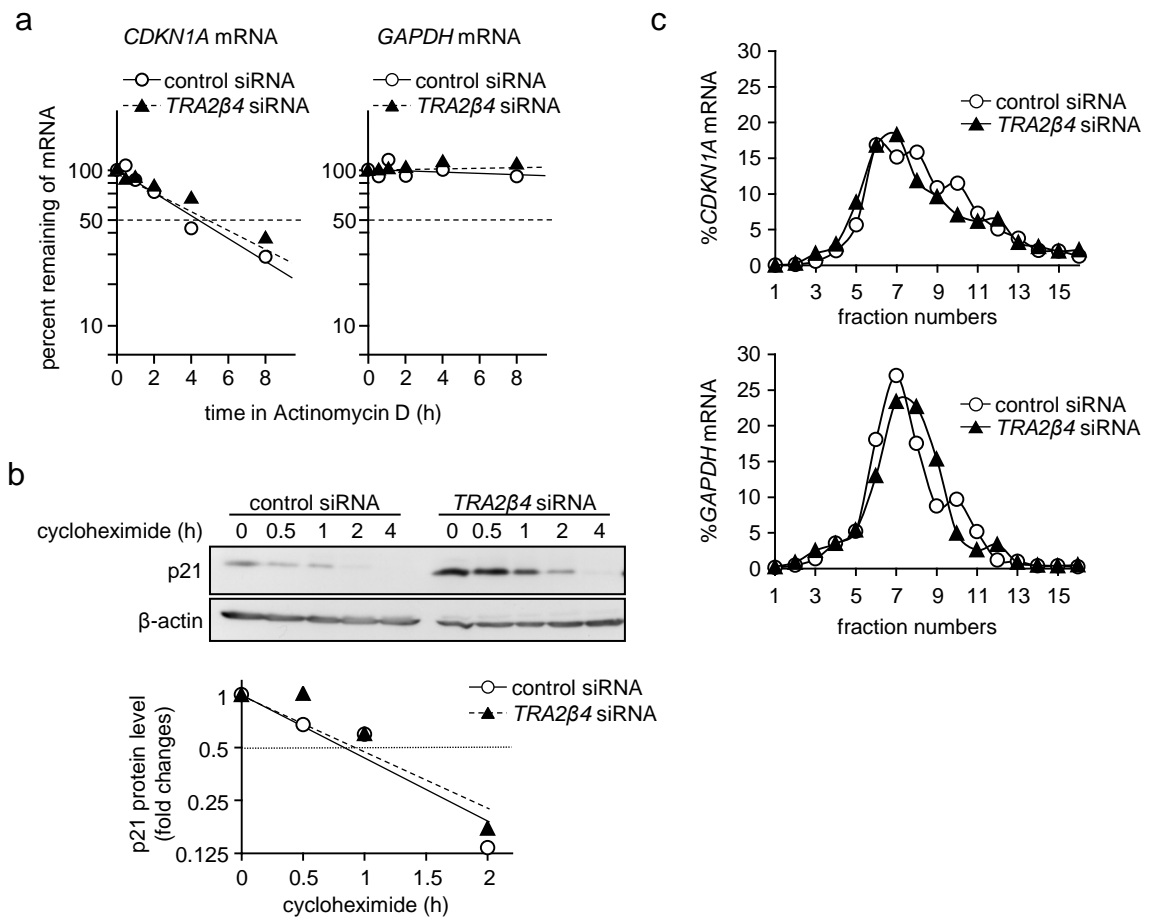

Fig. S7 *TRA2β4* knockdown does not affect stability of p21 protein or *CDKN1A* mRNA or translation rate of *CDKN1A* mRNA.

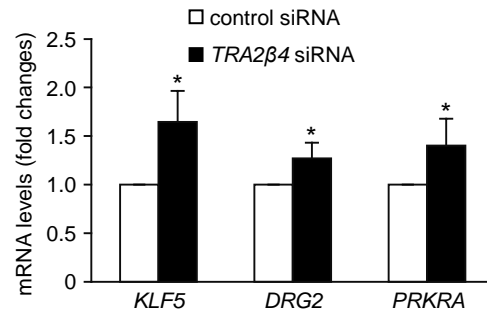

Fig. S8 *TRA2β4* knockdown up-regulates Sp1-mediated transcription of distinct genes.
